# Supplementary material for: High levels of molecular chlorine in the Arctic atmosphere
Source: Springer Nature journal article supplement (doi:10.1038/ngeo2046), 2014-01-12
Supplement: ngeo2046-s1.pdf [file ngeo2046-s1.pdf]

Browse Articles
| Nature Geoscience


Skip to main content

Thank you for visiting nature.com. You are using a browser version with limited support for CSS. To obtain
the best experience, we recommend you use a more up to date browser (or turn off compatibility mode in
Internet Explorer). In the meantime, to ensure continued support, we are displaying the site without styles
and JavaScript.

Advertisement


- View all journals
- Search
- Log in

- Explore content
- About the journal
- Publish with us

- Sign up for alerts
- RSS feed


1. nature
2. nature geoscience
3. browse articles

# Browse Articles

## Filter By:

Article Type

All

- All
- Article (1208)
- Author Correction (57)
- Backstory (78)
- Books & Arts (48)
- Comment (35)
- Commentary (107)
- Correspondence (133)
- Corrigendum (33)
- Editorial (219)
- Feature (23)
- In the press (32)
- Letter (965)
- Matters Arising (25)
- News & Views (819)
- Perspective (59)
- Progress Article (32)
- Publisher Correction (35)
- Research Briefing (48)
- Research Highlights (226)
- Review Article (78)

Year

All

- All
- 2024 (73)
- 2023 (249)
- 2022 (225)
- 2021 (201)
- 2020 (161)
- 2019 (223)
- 2018 (246)
- 2017 (226)
- 2016 (233)
- 2015 (280)
- 2014 (273)
- 2013 (339)
- 2012 (332)
- 2011 (301)
- 2010 (301)
- 2009 (325)
- 2008 (303)
- 2007 (55)

- ### Tectonics regulate CO2 release more strongly than chemical weathering in central Italy

  In a part of the Apennines, where the Earth’s crust is thin and heat flow is high, production of CO2 from deep below the mountains dominates over near-surface weathering processes that consume this greenhouse gas. Ultimately, the magnitude of deep CO2 release tips the balance towards a landscape that is a net carbon emitter.

  Research Briefing22 Apr 2024
- ### Global patterns in river water storage dependent on residence time

  A global gauge-corrected monthly river flow and storage dataset suggests that residence time is a key driver of water storage and variability and indicates substantial freshwater discharge to the ocean from the Maritime Continent.

  - Elyssa L. Collins
  - Cédric H. David
  - Georgina M. Sanchez

  ArticleOpen Access22 Apr 2024
- ### Evidence of strong aerosol cooling implies great efficacy of marine cloud brightening

  Aerosol–cloud interactions are the largest uncertainty in radiative forcing. We combined machine learning and long-term satellite observations to quantify aerosol fingerprints on tropical marine clouds, using degassing volcanic events in Hawaii as natural experiences, and found that cloud cover increased relatively by 50% in humid and stable atmosphere, leading to strong cooling radiative forcing.

  Research Briefing19 Apr 2024
- ### Deep CO2 release and the carbon budget of the central Apennines modulated by geodynamics

  The regional geodynamic gradient controls metamorphic carbon release during mountain building and regulates the inorganic carbon budget, according to carbon estimates in two river catchments of Italy’s central Apennines.

  - Erica Erlanger
  - Aaron Bufe
  - Niels Hovius

  ArticleOpen Access19 Apr 2024
- ### Weakening of the Atlantic Meridional Overturning Circulation abyssal limb in the North Atlantic

  Mooring observations and hydrographic data suggest the Atlantic Meridional Overturning Circulation abyssal limb has weakened over the past two decades in the North Atlantic, most likely due to reduced Antarctic Bottom Water formation rates.

  - Tiago Carrilho Biló
  - Renellys C. Perez
  - Torsten Kanzow

  Article19 Apr 2024
- ### Greater climate sensitivity implied by anvil cloud thinning

  Changes in anvil clouds with warming do not produce a negative feedback on climate sensitivity as previously thought, according to an ensemble of cloud-resolving models.

  - Adam B. Sokol
  - Casey J. Wall
  - Dennis L. Hartmann

  Article17 Apr 2024
- ### Out of sight burbankite

  Burbankite is a rare sodium carbonate mineral that is easily dissolved away in its host igneous rocks. Its formation and dissolution can help concentrate rare earth elements that are vital for a low-carbon future, as Sam Broom-Fendley explains.

  - Sam Broom-Fendley

  All Minerals Considered12 Apr 2024
- ### The ultra-lowdown on mantle heterogeneity

  Compositional and structural variations within Earth’s lower mantle are a complex puzzle to which seismic data hold clues.

  Editorial12 Apr 2024
- ### Seismic methodologies key to unlocking Earth’s lowermost mantle

  Advances in seismological observational and modelling techniques are needed to constrain complex lowermost mantle structures and understand their influence on the global dynamics and evolution of Earth’s interior.

  - Lauren Waszek

  Comment12 Apr 2024
- ### Ultralow velocity zones in the deep Earth

  *Nature Geoscience* spoke with Samantha Hansen, a geophysicist at the University of Alabama and Sebastian Rost, a global seismologist at the University of Leeds about the ultralow velocity zones in the lowermost mantle.

  - Alireza Bahadori

  Q&A12 Apr 2024
- ### Rapid Laurentide Ice Sheet growth preceding the Last Glacial Maximum due to summer snowfall

  The size and shape of the North American ice sheet during the Last Glacial Maximum was set by atmospheric moisture transport feedbacks during summer, not by the geometry of the earlier intermediate-sized ice sheet, according to a coupled climate–ice sheet model.

  - Lu Niu
  - Gregor Knorr
  - Gerrit Lohmann

  ArticleOpen Access12 Apr 2024
- ### Evolution of Earth’s oxygenation and temperature depends on surface carbonate accumulation

  There are no good models for the chemical evolution of the Earth’s surface over the planet’s lifetime, because models typically overlook the progressive build-up of carbonate rocks in the crust. A new model that includes this accumulation enables the reconstruction of major oxygen and temperature trends throughout Earth’s history.

  Research Briefing11 Apr 2024
- ### Substantial cooling effect from aerosol-induced increase in tropical marine cloud cover

  Satellite observations from volcanic eruptions suggest that aerosols induce substantial cooling due to the reflectivity of increased tropical marine cloud cover, implying a high climate sensitivity.

  - Ying Chen
  - Jim Haywood
  - Ulrike Lohmann

  ArticleOpen Access11 Apr 2024
- ### Crustal carbonate build-up as a driver for Earth’s oxygenation

  The accumulation and subsequent recycling of carbonate in the crust may have helped to drive the oxygenation of the early Earth, according to an ocean and atmosphere box model incorporating the inorganic carbon cycle.

  - Lewis J. Alcott
  - Craig Walton
  - Benjamin J. W. Mills

  ArticleOpen Access10 Apr 2024
- ### Anthropogenic impacts on mud and organic carbon cycling

  Human activities have altered the production, transport and fate of mud and associated organic carbon, with important implications for global carbon cycling.

  - Thomas S. Bianchi
  - Lawrence M. Mayer
  - Pierre Regnier

  Review Article09 Apr 2024
- ### Production of Neoproterozoic banded iron formations in a partially ice-covered ocean

  Neoproterozoic banded iron formations formed in partially glaciated oceans where iron-rich and oxygenated water masses met, according to ocean modelling.

  - Kaushal Gianchandani
  - Itay Halevy
  - Eli Tziperman

  Brief Communication09 Apr 2024
- ### Pervasive fluorinated chemicals

  Pollution by per- and polyfluorinated alkyl substances (PFAS) is widespread in global water resources and likely to be underestimated, according to global analysis of available PFAS data.

  - Mark Strynar

  News & Views08 Apr 2024
- ### Don’t judge the Moon’s interior by its cover

  The Moon’s primordial solidification is believed to have produced a layer of dense ilmenite cumulates beneath the crust. Remnants of this layer have now been detected under the lunar nearside.

  - Peter B. James

  News & Views08 Apr 2024
- ### Vestiges of a lunar ilmenite layer following mantle overturn revealed by gravity data

  The Moon’s gravity field preserves a record of the overturn of the early lunar mantle and sinking of dense ilmenite-bearing cumulates, according to a comparison of Gravity Recovery and Interior Laboratory gravity data and geodynamic models.

  - Weigang Liang
  - Adrien Broquet
  - Alexander J. Evans

  Article08 Apr 2024
- ### Underestimated burden of per- and polyfluoroalkyl substances in global surface waters and groundwaters

  A global data analysis suggests that a large fraction of surface waters and groundwaters globally have concentrations of per- and polyfluoroalkyl substances (PFAS) that exceed international advisories or national regulations.

  - Diana Ackerman Grunfeld
  - Daniel Gilbert
  - Denis M. O’Carroll

  ArticleOpen Access08 Apr 2024

- Previous page
- page 1
- page 2
- page 3
- …
- page 218
- Next page

## Explore content

- Research articles
- Reviews & Analysis
- News & Comment
- Current issue
- Collections

- Follow us on Twitter
- Sign up for alerts
- RSS feed


## About the journal

- Aims & Scope
- Journal Information
- Journal Metrics
- About the Editors
- Our publishing models
- Editorial Values Statement
- Editorial Policies
- Content Types
- Web Feeds
- Press Releases
- Contact
- Research Cross-Journal Editorial Team
- Reviews Cross-Journal Editorial Team


## Publish with us

- Submission Guidelines
- For Reviewers
- Language editing services
- Submit manuscript

## Search

Search articles by subject, keyword or author

Show results from

All journals
This journal

Search

Advanced search

### Quick links

- Explore articles by subject
- Find a job
- Guide to authors
- Editorial policies

Nature Geoscience (*Nat. Geosci.*)

ISSN 1752-0908 (online)

ISSN 1752-0894 (print)

## nature.com sitemap

### About Nature Portfolio

- About us
- Press releases
- Press office
- Contact us

### Discover content

- Journals A-Z
- Articles by subject
- protocols.io
- Nature Index

### Publishing policies

- Nature portfolio policies
- Open access

### Author & Researcher services

- Reprints & permissions
- Research data
- Language editing
- Scientific editing
- Nature Masterclasses
- Research Solutions

### Libraries & institutions

- Librarian service & tools
- Librarian portal
- Open research
- Recommend to library

### Advertising & partnerships

- Advertising
- Partnerships & Services
- Media kits
- Branded
  content

### Professional development

- Nature Careers
- Nature 
  Conferences

### Regional websites

- Nature Africa
- Nature China
- Nature India
- Nature Italy
- Nature Japan
- Nature Middle East

- Privacy
  Policy
- Use
  of cookies
- Your privacy choices/Manage cookies
- Legal
  notice
- Accessibility
  statement
- Terms & Conditions
- Your US state privacy rights

© 2024 Springer Nature Limited

xml version="1.0" encoding="UTF-8"?
